1 **NLRP1B and NLRP3 control the host response following colonization with the commensal**  
2 **protist *Tritrichomonas musculus*.**

3 Pailin Chiaranunt\*, Kyle Burrows\*, Louis Ngai\*, Eric Y. Cao\*, Helen Liang\*, Catherine J. Streutker  
4 †,‡, Stephen E. Girardin\*,† and Arthur Mortha\*,§

5 \*Department of Immunology, University of Toronto, Toronto, ON, Canada.

6 †Department of Laboratory Medicine and Pathobiology, University of Toronto, Toronto, ON,  
7 Canada.

8 ‡Saint Michael's Hospital, Toronto, ON, Canada.

9 §Corresponding Author ([arthur.mortha@utoronto.ca](mailto:arthur.mortha@utoronto.ca))

10

11

12

13

14 **Abstract**

15 Commensal intestinal protozoa, unlike their pathogenic relatives, are neglected members of the  
16 mammalian microbiome. These microbes have a significant impact on the host's intestinal immune  
17 homeostasis, typically by elevating anti-microbial host defense. *Tritrichomonas musculus* (*T. mu*),  
18 a protozoan gut commensal, strengthens the intestinal host defense against enteric Salmonella  
19 infections through *Asc*- and *Il1r1*-dependent Th1 and Th17 cell activation. However, the  
20 underlying inflammasomes mediating this effect remain unknown. Here, we report that  
21 colonization with *T. mu* results in an increase in luminal extracellular ATP, elevated levels of IL-  
22 1 $\beta$ , and increased numbers of IL-18 receptor-expressing Th1 and Th17 cells in the colon. Mice  
23 deficient in either *Nlrp1b* or *Nlrp3* failed to display these protozoan-driven immune changes and  
24 lost resistance to enteric Salmonella infections even in the presence of *T. mu*. These findings  
25 demonstrate that *T. mu*-mediated host protection requires sensors of extra and intracellular ATP to  
26 confer resistance to enteric Salmonella infections.

27 **KEY POINTS:**

- 28 • Intestinal colonization with the commensal *Tritrichomonas musculus* elevates luminal ATP  
29 levels
- 30 • NLRP1B and NLRP3 activation is required for *Tritrichomonas musculus*-driven Th cell  
31 response.

32

33

34

## 35 **Introduction**

36 The mammalian intestinal microbiota is a rich multi-kingdom ecosystem, comprising of bacteria,  
37 viruses, protozoa, fungi, and archaea that modulate host immunity. A diverse multi-kingdom  
38 microbiota has been suggested to increase host fitness and improve outcomes in enteric infections  
39 (1, 2). Recent work has begun to elucidate the roles that these mostly neglected non-bacterial  
40 commensal microorganisms have in this community, revealing key mechanisms of innate and  
41 adaptive immune responses to the mycobiota (3-5) and enteric virome (6, 7). The central sensory  
42 elements of these microbes include Toll-like receptors (TLRs) and Nod-like receptors (NLRs), C-  
43 type lectin receptors (CLRs), and RIG-I-like receptors (RLRs), which are required for the host  
44 recognition of bacteria, fungi, and viruses, respectively (8-10). Much of the work investigating the  
45 role of sensory systems for helminths and pathogenic protozoa (e.g. *Toxoplasma* spp., *Giardia*  
46 spp., or *Cryptosporidium* spp.) revealed a combinatorial requirement of TLRs, NLRs, and taste  
47 receptors for effective host sensing and parasite defense (11, 12). However, other less prominent  
48 members of the protozoa kingdom are considered “commensal-like” (13, 14). For example,  
49 *Dientamoeba fragilis* (*D. fragilis*), a member of the order Trichomonadida, often shows  
50 asymptomatic colonization in humans (15). *Tritrichomonas* spp., including the recently identified  
51 *Tritrichomonas musculus* (*T. mu*), *Tritrichomonas muris* (*T. muris*), and *Tritrichomonas raineri*  
52 (*T. raineri*), are commensal protozoa found in wild animals and laboratory mice at certain facilities  
53 (12, 16-18) (Mortha A., unpublished observation). Unlike pathogenic protozoa, these gut-dwelling  
54 Tritrichomonads are not cleared by the immune system, instead resulting in chronic, asymptomatic  
55 colonization in mice following horizontal or vertical transmission (17). Nevertheless, their  
56 engraftment into the gut microbiome induces a strong innate and adaptive immune response in the  
57 host (11, 12, 16-18). All three *Tritrichomonas* spp. were found to activate small intestinal group 2

58 innate lymphoid cells (ILC2) via Tuft cell-derived interleukin(IL)-25 (11, 12, 17, 18).  
59 Interestingly, colonization of mice with *T. musculus* or *T. muris* additionally resulted in prominent  
60 and persistent induction and expansion of colonic Th1 and Th17 cells (16, 17). The elevated  
61 differentiation of interferon (IFN)- $\gamma$ - and IL-17A-producing helper T (Th) cells exacerbated T cell-  
62 driven autoimmunity and sporadic colorectal cancer, while conferring resistance to enteric  
63 infections by *Salmonella typhimurium* (*S. typhimurium*) (16, 17). The Th1 and Th17 responses  
64 required *Asc* (apoptosis-associated speck-like protein containing a CARD), *Il18*, and *Il1r1*,  
65 suggesting that ASC-associated NLRs may be required for the detection of *T. mu* in the gut (17).

66 Here, we demonstrate that colonization with *T. mu* results in elevated levels of luminal  
67 extracellular adenosine 3'-triphosphate (ATP), accompanied by increased concentrations of  
68 colonic IL-1 $\beta$ . Colonic Th1 and Th17 cells in *T. mu*-colonized mice expressed the IL-18 receptor  
69 (IL-18R) and protected the host from *S. typhimurium*-induced pathology and tissue dissemination.  
70 *T. mu*-driven activation of Th1 and Th17 cells was dependent on *Nlrp1b* and in parts on *Nlrp3*. In  
71 line with these findings, *Nlrp1b*<sup>-/-</sup> and *Nlrp3*<sup>-/-</sup> mice displayed impaired protection against enteric  
72 *Salmonella* infection despite the presence of *T. mu*. These findings demonstrate that *T. mu*-  
73 mediated host immune modulation requires the NLRP1B and NLRP3 inflammasomes to confer  
74 host protection against Salmonella infections.

## 76 **Materials and Methods**

### 77 **Mice**

78 C57BL/6, B6.129S6-*Nlrp1b*<sup>tm1Bhk/J</sup> (*Nlrp1b*<sup>-/-</sup>), B6.129S6-*Nlrp3*<sup>tm1Bhk/J</sup> (*Nlrp3*<sup>-/-</sup>), and B6.129P2-  
79 *P2rx7*<sup>tm1Gab/J</sup> (*P2rx7*<sup>-/-</sup>) mice were purchased from Jackson Laboratory and subsequently bred in-  
80 house under specific pathogen-free conditions at the University of Toronto, Division of  
81 Comparative Medicine. All experiments were conducted using age- and sex-matched littermates  
82 and with approval by the animal care committee, University of Toronto.

### 83 **Purification and colonization of *Tritrichomonas musculus***

84 Cecal contents of *T. mu*<sup>+</sup> mice were collected, resuspended in PBS, filtered through a 70 µm cell  
85 strainer, and spun for 10min at 600 x g. The resulting pellet was put through a 40/80% Percoll  
86 gradient centrifugation. The *T. mu*-enriched interphase was collected. Protozoa were then  
87 resuspended in PBS and double sorted into PBS based on size, granularity, and violet  
88 autofluorescence on a FACS ARIA II. Two million *T. mu* were orally gavaged into mice  
89 immediately after the sort.

### 90 **Isolation of colonic lamina propria and mesenteric lymph node leukocytes**

91 Colonic lamina propria (LP) cells were isolated as previously described(19). Briefly, colons were  
92 washed in HBSS plus 5 mM EDTA and 10 mM HEPES to strip the epithelium. Tissues were then  
93 minced and shaken at 37°C for 20 min in digestion buffer (HBSS with calcium and magnesium,  
94 supplemented with 10 mM HEPES, 4% FBS, penicillin-streptomycin (Sigma Aldrich), 0.5 mg/mL  
95 DNase I (Sigma Aldrich), and 0.5 mg/mL Collagenase (Sigma Aldrich)). Supernatants were  
96 collected and enriched for leukocytes using a 40/80% Percoll gradient, after which cells are ready

97 for downstream use. MLN cells were mashed through a 70  $\mu\text{m}$  cell strainer and resuspended in  
98 FACS buffer (PBS with 2% FBS and 5 mM EDTA).

### 99 **Salmonella infection and pathological assessment**

100 Groups of age- and sex-matched littermates were orally gavaged with either PBS or  $2 \times 10^6$  purified  
101 *T. mu.* 3 weeks later, mice were orally gavaged with streptomycin and infected with *Salmonella*  
102 *typhimurium* as previously described (20). Mice were euthanized 48h later, and cecal weight was  
103 recorded. Cecal pieces were fixed, embedded in paraffin, sectioned, and stained with hematoxylin  
104 and eosin (H&E) according to standard procedures. Pathological evaluation was performed in a  
105 blinded fashion by a pathologist and scored as previously described (20). Colony forming units  
106 (CFUs) of *S. typhimurium* in feces, colon, cecum, mLN, liver, and spleen were measured on  
107 MacConkey agar plates containing 50  $\mu\text{g}/\text{mL}$  streptomycin.

### 108 **Flow cytometry**

109 For intracellular staining, cells were first stimulated for 4 h with PMA, ionomycin, and protein  
110 transport inhibitor cocktail containing Brefeldin A and Monensin (eBioscience). Cells were then  
111 incubated on ice for 20 min with Fc block (CD16/CD32; eBioscience), surface markers, and  
112 Fixable Viability Dye eFluor™ 506 (eBioscience). Cells were fixed and permeabilized using the  
113 BD Cytofix/Cytoperm Kit, followed by cytokine stains, then re-fixed and permeabilized using the  
114 eBioscience Foxp3/Transcription Factor Staining Buffer Set, followed by transcription factor  
115 stains. Samples were analyzed on an LSR Fortessa X-20 (BD).

116 For surface staining, the following anti-mouse Abs were used: TCR $\beta$  (H57-597; eBioscience),  
117 CD4 (GK1.5; BioLegend), CD45 (30-F11; BioLegend), CD218a (IL-18Ra) (P3TUNYA;  
118 eBioscience), ST2 (RMST2-2; eBioscience), CD11b (M1/70; BioLegend), Ly6c (HK1.4;

119 eBioscience), CD64 (X54-5/7.1; BioLegend), and MHCII (I-A/I-E) (M5/114.15.2; eBioscience).  
120 Intracellular markers include anti-mouse IFN- $\gamma$  (XMG1.2; eBioscience), TNF $\alpha$  (MP6-XT22;  
121 eBioscience), IL-10 (JESS-16E3; BioLegend), IL-17A (TC11-18H10.1; BioLegend), and FOXP3  
122 (MF-14; BioLegend). CD4<sup>+</sup> T cells were gated as Live CD45<sup>+</sup> TCR $\beta$ <sup>+</sup> CD4<sup>+</sup>. Immature  
123 macrophages were gated as Live CD45<sup>+</sup> CD64<sup>+</sup> CD11b<sup>+</sup> Ly6c<sup>hi</sup> MHCII<sup>lo</sup>.

## 124 **ELISA**

125 Proximal colon explants were weighed, washed in RPMI supplemented with 50 ug/mL gentamicin  
126 (Gibco) for 30 minutes at room temperature, then cultured in 500 uL complete RPMI plus 5% FBS  
127 (Gibco), 50 ug/mL gentamicin (Sigma Aldrich), and penicillin-streptomycin (Sigma Aldrich) for  
128 18-24 h. Supernatants were collected and used for cytokine measurement with IL-18 (Invitrogen;  
129 sensitivity 19.0 pg/mL), IL-1 $\beta$  (Invitrogen; sensitivity 8 pg/mL), and IL-33 (Invitrogen; sensitivity  
130 25 pg/mL) ELISA kits according to the manufacturer's instructions.

## 131 **Luminal ATP measurement**

132 Fecal samples were collected, homogenized in PBS plus 0.01% NaN<sub>3</sub> using the Omni Bead Ruptor  
133 24, and centrifuged twice (800 x g followed by 10000 x g) to remove debris and microbes.  
134 Supernatants were filtered through a 0.2  $\mu$ m filter, then analyzed for ATP levels using the  
135 ENLITEN ATP Assay System Bioluminescence Detection Kit (Promega) according to the  
136 manufacturer's instructions.

## 137 **Statistical analyses**

138 All data are shown as mean  $\pm$  SEM. Statistical tests were performed using GraphPad Prism as  
139 detailed in figure legends.





141 **Results and Discussion**

142

143 **Colonization with *T. mu* increases luminal extracellular ATP levels and IL-1 $\beta$  release in the**  
144 **colon.**

145 Activation of colonic Th1 and Th17 cells following colonization with the commensal protist *T. mu*  
146 requires ASC, IL-18, and IL-1R (17). Extracellular ATP is a ubiquitously produced metabolite and  
147 danger associated molecular pattern (DAMP) that facilitates the production of active IL-18 and  
148 IL-1 $\beta$  in an ASC-dependent manner (21). Luminal ATP levels have previously been implicated in  
149 the differentiation of Th17 cells and may derive from commensal bacteria or dying host cells (22).  
150 To determine whether colonization of wild-type (WT) mice with *T. mu* affects the extracellular  
151 ATP concentrations in the gut lumen, ATP levels were measured in fecal samples using a  
152 luciferase-based luminescence assay. Following colonization for 21 days, mice carrying *T. mu*  
153 displayed significantly elevated concentrations of extracellular ATP in the gut lumen (Figure 1A).  
154 In line with previous reports, increased levels of extracellular ATP resulted in higher IL-1 $\beta$   
155 concentrations in colonic explants (Figure 1B) (22). Interestingly, levels of IL-18 and the type 2  
156 immunity-associated alarmin IL-33 did not show a significant increase following colonization by  
157 *T. mu*, despite reports of the latter exhibiting ATP-dependent activation at other mucosal surfaces  
158 (Figure 1C) (23). These results indicate that colonization with the protozoan commensal *T. mu*  
159 results in the local activation of the innate immune system.

160

161 **The protozoan commensal *T. mu* induces the accumulation of IL-18R<sup>+</sup> Th1 and Th17 cells in**  
162 **the colonic lamina propria.**

163 To determine the effects of *T. mu* colonization on Th cell activation, we analyzed IFN- $\gamma$  and IL-  
164 17A production in CD4<sup>+</sup> T cells in the colonic lamina propria. Mice colonized with *T. mu* displayed  
165 significantly increased percentage and absolute number of IFN- $\gamma$ <sup>+</sup> Th1 cells and IL-17A<sup>+</sup> Th17  
166 cells (Figure 2A). This induction of Th1 and Th17 cells required viable protist, as oral gavage of  
167 heat-killed *T. mu* did not result in an elevation of these cells in the colonic lamina propria  
168 (Supplementary Figure 1A). In line with previous findings, colonization with *T. mu* increased the  
169 number of IL-18R-expressing CD4<sup>+</sup> Th cells, including IFN- $\gamma$ <sup>+</sup> Th1 cells and IL-17A<sup>+</sup> Th17 cells  
170 (Figure 2B and 2C) (17). ST2, the receptor of IL-33 is involved in the induction of Th2 and  
171 regulatory T cells and has been shown to contribute to the anti-viral Th1 response during the acute  
172 effector phase (24, 25). However, IFN- $\gamma$ <sup>+</sup> Th1 cells in mice colonized with *T. mu* did not express  
173 increased levels of ST2, suggesting that their polarization does not depend on IL-33 (Figure 2D).  
174 The expression of IL-18R on human and murine cells, including intestinal epithelial cells, has  
175 previously been reported to require TNF $\alpha$ , which can be produced by activated Th1 cells (26, 27).  
176 To determine whether IL-18R expression on Th cells would correlate with elevated TNF $\alpha$  release  
177 by colonic Th cells, we assessed TNF $\alpha$  production of these cells using flow cytometry. Th cells  
178 did not release increased levels of TNF $\alpha$  after colonization with *T. mu*, suggesting alternative  
179 sources of TNF $\alpha$  as a possible reason for the increase in IL-18R-expressing Th cells  
180 (Supplementary Figure 1B). We previously demonstrated changes in the myeloid immune  
181 landscape following colonization with *T. mu*. These changes included an increase in colonic  
182 dendritic cells (DCs) migrating to the mesenteric lymph nodes and an accumulation of Ly6C<sup>+</sup>  
183 TNF $\alpha$ <sup>+</sup> immature macrophages in the lamina propria of *T. mu*-colonized mice (17). Macrophage  
184 activation by extracellular ATP uses a P2X7R-dependent mechanism (21, 22). To investigate  
185 whether the accumulation of immature macrophages in the colon of *T. mu*-colonized mice required

186 ATP-mediated activation of P2X7R, infiltrating Ly6C<sup>+</sup> macrophage counts were quantified  
187 following colonization with *T. mu* in *P2xr7<sup>-/-</sup>* mice and age- and sex-matched littermate controls.  
188 In line with our previous report, WT littermate control mice showed a significant increase in  
189 immature macrophages in the presence of *T. mu*, while the colons of *P2xr7<sup>-/-</sup>* mice remained  
190 unchanged in macrophage numbers after colonization with the protist (Supplementary Figure 1C).  
191 These data suggest that *T. mu* colonization facilitates the P2X7R-dependent accumulation of  
192 immature macrophages, a potent source for TNF $\alpha$ , followed by the release of IL-1 $\beta$  and the  
193 differentiation of Th1 and Th17 cells in an IL-18R-dependent manner.

194

195 **NLRP1B and NLRP3 are both required for a full Th1 and Th17 response after *T. mu***  
196 **colonization.**

197 Previous findings demonstrated that host resistance against the pathogenic protist *Toxoplasma*  
198 *gondii* requires the activation of both the NLRP1B and NLRP3 inflammasomes and the innate  
199 production of IFN- $\gamma$  (28-30). Both NLRs get activated through changes in either intra- or  
200 extracellular ATP levels and induce the proteolytic processing of pro-IL-1 $\beta$  and pro-IL-18 (31,  
201 32). Given the elevated extracellular concentrations of luminal ATP in *T. mu*<sup>+</sup> mice, we  
202 investigated whether *Nlrp1b* or *Nlrp3* contributes to the colonic Th1 and Th17 response following  
203 *T. mu* colonization. Analysis of IFN- $\gamma$  and IL-17A production by Th cells in littermate WT, *Nlrp1b*<sup>-</sup>  
204 <sup>-</sup>, and *Nlrp3*<sup>-/-</sup> mice revealed no significant changes in IFN- $\gamma$  or IL-17A production during steady  
205 state (Figure 3A and B). However, in contrast to their WT counterparts, *Nlrp1b*<sup>-</sup> and *Nlrp3*<sup>-</sup>  
206 deficient mice failed to show a significant induction of Th1 and Th17 cells in the colonic lamina  
207 propria following colonization with *T. mu* (Figure 3A and 3B). Noteworthy, *Nlrp3*<sup>-/-</sup> mice showed

208 a blunted, but significant induction of IL-17<sup>+</sup>IFN- $\gamma$ <sup>+</sup> Th cells suggesting a partial requirement for  
209 NLRP3 in the regulation Th cell responses following colonization by *T.mu* (Figure 3B). *Nlrp1b*<sup>-/-</sup>  
210 and *Nlrp3*<sup>-/-</sup> mice did not display increased colonic IL-1 $\beta$  nor IL-18 in the presence of *T. mu*,  
211 suggesting a lack of an innate immune response (Supplementary Figure 2A). Accordingly, *T. mu*-  
212 colonized *Nlrp1b*<sup>-/-</sup> and *Nlrp3*<sup>-/-</sup> mice lacked both the accumulation of immature Ly6C<sup>+</sup>  
213 macrophages and IL-18R expression on Th1 and Th17 cells (Figure 3C and 3D). These results  
214 suggest that the underlying immune adaptation in the colon of *T. mu*-colonized mice requires ATP  
215 sensing through NLRP1B and NLRP3.

216

217 ***T. mu* mediates host protection against *Salmonella typhimurium* in an NLRP1B- and NLRP3-**  
218 **dependent fashion.**

219 IFN- $\gamma$ , IL-18, and IL-1 $\beta$  have previously been demonstrated to play a critical role in the host  
220 defense against intestinal infection by *Salmonella typhimurium* (*S. typhimurium*) (33, 34).  
221 Colonization of WT mice with the commensal protist *T. mu* increased colonic IL-1 $\beta$  levels and led  
222 to an accumulation of IL-18R<sup>+</sup> IFN- $\gamma$ -producing Th1 cells in an NLRP1B and NLRP3-dependent  
223 fashion, implying that the two NLR inflammasomes may be required for the previously shown *T.*  
224 *mu*-induced protection against enteric *Salmonella* infection (Figure 3) (17). To test this hypothesis,  
225 groups of littermate WT, *Nlrp1b*<sup>-/-</sup> and *Nlrp3*<sup>-/-</sup> mice were either orally infected with *S.*  
226 *typhimurium* alone, or colonized with *T. mu* for 3 weeks prior to infection. The colonization of  
227 mice with *T. mu* did not affect cecal CFUs of *S. typhimurium* across all genotypes, indicating  
228 successful infections and the absence of colonization resistance irrespective of NLRP1B, NLRP3,  
229 or *T. mu* (Figure 4A). Only littermate control mice carrying *T. mu* failed to show a characteristic

230 loss in cecal weight following infection with *S. typhimurium*, implicating an amelioration of  
231 disease in the presence of *T. mu* (Figure 4B). Differences in cecum weights did not significantly  
232 change in *Nlrp1b*<sup>-/-</sup> or *Nlrp3*<sup>-/-</sup> mice after *S. typhimurium* infection, even in the presence of *T. mu*,  
233 and ranged in between the cecum weights of *T. mu*-free and *T.mu*-colonized littermate controls  
234 (Figure 4B). Blinded pathology scoring of hematoxylin and eosin-stained Salmonella-infected  
235 cecal tissue sections indicated that littermate WT mice colonized with *T. mu* displayed normal  
236 histology, with minimal signs of inflammation, in contrast to their *T. mu*-free controls. *Nlrp1b*<sup>-/-</sup>  
237 mice presented with comparable levels of tissue damage and inflammatory infiltrates, even in the  
238 presence of *T. mu* (Figure 4C and D). While *Nlrp1b*<sup>-/-</sup> mice failed to show protection against  
239 Salmonella infection, this effect was less pronounced in *Nlrp3*<sup>-/-</sup> mice. These findings suggest that  
240 *T. mu* colonization initiates host resistance to *S. typhimurium* in an NLRP1B-dependent and  
241 NLRP3-supported fashion. Damage to the intestinal epithelium following infection facilitates the  
242 dissemination of *S. typhimurium* into peripheral organs and results in a breakdown of mucosal  
243 barrier function (20). To determine if *Nlrp1b*<sup>-/-</sup> and *Nlrp3*<sup>-/-</sup> mice would display altered  
244 dissemination of *S. typhimurium* into peripheral organs in the presence of *T. mu*, *S. typhimurium*  
245 CFUs in the spleen and liver across all experimental groups were quantified. *Nlrp1b*<sup>-/-</sup> and *Nlrp3*<sup>-/-</sup>  
246 <sup>-/-</sup> mice displayed increased dissemination of *S. typhimurium* into the liver and spleen, even in the  
247 presence of *T. mu* (Figure 4E), suggesting that both the NLRP1B and NLRP3 inflammasomes are  
248 required for elevated mucosal barrier function driven by the protozoan commensal *T. mu*.

249

250 **Conclusion**

251 In this study, we demonstrate that colonization with the protozoan commensal *T. mu* increases  
252 intestinal levels of extracellular ATP. It has previously been demonstrated that some bacteria  
253 release ATP into the extracellular space during *in vitro* growth (35). The bacterial microbiome was  
254 shown to contribute to the development of Th17 cells and activation of myeloid cells via the release  
255 of ATP into the intestinal lumen, suggesting commensal bacteria as a possible source of  
256 extracellular ATP (22). Additional sources of extracellular ATP include dying epithelial cells and  
257 activated immune cells (21). Colonization with *T. mu* may therefore contribute to the elevated  
258 levels of ATP in the extracellular space via direct release of ATP by the protist, induction of  
259 epithelial cell death, modulation of the bacterial microbiome, or activation of intestinal immune  
260 cells. The possibility of all these sources, individually or in concert, contributing to the elevated  
261 levels of extracellular ATP makes this observation a particularly interesting area of future  
262 investigation. The resulting alterations in extracellular ATP concentrations following colonization  
263 by *T.mu* collectively promote the activation of the NLRP1B and NLRP3 inflammasomes.

264 In addition, we demonstrate that colonization of mice with *T. mu* increases colonic IL-1 $\beta$  levels  
265 and induces the accumulation of immature macrophages, IFN- $\gamma$ -producing Th1 cells, and IL-17A-  
266 releasing Th17 cells in the colonic lamina propria. Colonic Th1 and Th17 cells in *T. mu*-colonized  
267 mice expressed IL-18R, indicating their ability to respond to IL-18 stimulation. This IL-18R-  
268 dependent Th1 and Th17 response required NLRP1B and NLRP3 and may be driven by the  
269 inflammasome-dependent accumulation of Ly6C<sup>+</sup> TNF $\alpha$ -releasing immature macrophages or  
270 migratory dendritic cells producing IL-12 (17). In conclusion, the introduction of a protozoan  
271 commensal into an established microbiome changes the host immune landscape in the intestine  
272 and confers amelioration of Salmonella-induced disease severity. We demonstrate that NLRP1B

273 and in parts NLRP3 are critical in the innate and adaptive immune response following colonization  
274 with *T. mu* and are required for the host's anti-microbial activity against enteric Salmonella  
275 infections.

276 Salmonellosis ranks amongst the world's top 5 foodborne illness with an annual 1.35M infections,  
277 23.000 hospitalizations and 450 deaths in the United States ([ww.cdc.gov](http://www.cdc.gov)). The status of protozoan  
278 colonization of those infected is not known. Within the healthy population, ~10% of individuals  
279 are found to carry *T.mu*'s closest human relative *Dientamoeba fragilis* (36). Considering  
280 observations of Salmonella infections in multiple populations across varying hygiene standards,  
281 raises the possibility that underlying commensal protozoan colonization may result in higher  
282 asymptomatic Salmonella infections (37). These asymptomatic infections with Salmonella are  
283 considered a public health hazard, as spread of infections to non-infected individuals may be  
284 promoted more rapidly through these asymptomatic carriers (39). However, the heterogeneity of  
285 the infecting Salmonella strains may affect the degree of protection conferred by the protozoan  
286 commensal and vice-versa, diversity and heterogeneity of colonizing protozoa may similarly  
287 impact protection against enteric infections (38). More research is need to fully grasp the impact  
288 of protozoan commensals on host immunity, anti-microbial protection and epidemiology of  
289 infectious diseases.

290 Appreciating the life style of free living wild mice, which often feed on contaminated food, the  
291 presence of *Tritrichomonas* spp. as part of their microbiome could present an evolutionary  
292 advantage, permitting the consumption of contaminated food that would otherwise result in  
293 sickness and disease (Mortha, unpublished observation). Whether protection against other  
294 foodborne pathogens may also be regulated by the *T.mu*-driven activation of the NLRP1B and  
295 NLRP3 inflammasome in mice remains unknown. Our findings warrant considerations for

296 experimental designs in disciplines investigating host-pathogen interactions. Careful surveillance  
297 of the intestinal protozoan status in research animals and the implementation of standardized  
298 experimental controls are a necessity considering protozoan commensals as member of the healthy  
299 mouse microbiome. The observed immune phenotypes in mice carrying *T.mu* may result in  
300 misinterpretation by investigators if the status of *Tritrichomonas* spp. is not considered, or variable  
301 across the studied animal cohort. The horizontal and vertical transmission of *T.mu* between mouse  
302 lines further calls for the appropriate implementation of littermate controls (40). The methodology  
303 used in this study, describes the isolation and colonization of mice with *Tritrichomonas* spp. and  
304 provides a guideline for investigators to determine whether their experimental systems may be  
305 influenced by a neglected protozoan commensal.

306 Collectively, we demonstrate that the protozoan commensal *T.mu* activates the NLRP1B, and in  
307 parts NLRP3 inflammasomes, mediating the remodeling of the host's intestinal immune landscape  
308 to elicit protection against the pathology caused by enteric *Salmonella* infections. Future studies  
309 will investigate the protective role of *T.mu* against infections with other foodborne pathogens.

310



311 **Disclosures**

312 The authors have no financial conflicts of interest.

313 **Acknowledgments**

314 We thank members of the #onlylabever for their discussion and experimental assistance. We  
315 acknowledge Dr. Nathalie Simard and Janine Charron (Temerty Faculty of Medicine Flow  
316 Cytometry Core) for providing cell-sorting support. We thank Dr. Dana Philpott and Dr. Juan-  
317 Carlos Zuniga-Plücker for critical reading of the manuscript.

318

319 **References:**

- 320 1. Filyk HA, Osborne LC. 2016. The Multibiome: The Intestinal Ecosystem's Influence on  
321 Immune Homeostasis, Health, and Disease. *EBioMedicine* 13: 46-54
- 322 2. Gutierrez MW, Arrieta MC. 2021. The intestinal mycobiome as a determinant of host  
323 immune and metabolic health. *Curr Opin Microbiol* 62: 8-13
- 324 3. Leonardi I, Paramsothy S, Doron I, Semon A, Kaakoush NO, Clemente JC, Faith JJ,  
325 Borody TJ, Mitchell HM, Colombel JF, Kamm MA, Iliev ID. 2020. Fungal Trans-kingdom  
326 Dynamics Linked to Responsiveness to Fecal Microbiota Transplantation (FMT) Therapy  
327 in Ulcerative Colitis. *Cell Host Microbe* 27: 823-9 e3
- 328 4. Doron I, Leonardi I, Li XV, Fiers WD, Semon A, Bialt-DeCelie M, Migaud M, Gao IH,  
329 Lin WY, Kusakabe T, Puel A, Iliev ID. 2021. Human gut mycobiota tune immunity via  
330 CARD9-dependent induction of anti-fungal IgG antibodies. *Cell* 184: 1017-31 e14
- 331 5. Ost KS, O'Meara TR, Stephens WZ, Chiaro T, Zhou H, Penman J, Bell R, Catanzaro JR,  
332 Song D, Singh S, Call DH, Hwang-Wong E, Hanson KE, Valentine JF, Christensen KA,  
333 O'Connell RM, Cormack B, Ibrahim AS, Palm NW, Noble SM, Round JL. 2021. Adaptive  
334 immunity induces mutualism between commensal eukaryotes. *Nature*
- 335 6. Dallari S, Heaney T, Rosas-Villegas A, Neil JA, Wong SY, Brown JJ, Urbanek K,  
336 Herrmann C, Depledge DP, Dermody TS, Cadwell K. 2021. Enteric viruses evoke broad  
337 host immune responses resembling those elicited by the bacterial microbiome. *Cell Host*  
338 *Microbe* 29: 1014-29 e8
- 339 7. Yeung F, Chen YH, Lin JD, Leung JM, McCauley C, Devlin JC, Hansen C, Cronkite A,  
340 Stephens Z, Drake-Dunn C, Fulmer Y, Shopsin B, Ruggles KV, Round JL, Loke P, Graham

- 341 AL, Cadwell K. 2020. Altered Immunity of Laboratory Mice in the Natural Environment  
342 Is Associated with Fungal Colonization. *Cell Host Microbe* 27: 809-22 e6
- 343 8. Carvalho FA, Aitken JD, Vijay-Kumar M, Gewirtz AT. 2012. Toll-like receptor-gut  
344 microbiota interactions: perturb at your own risk! *Annu Rev Physiol* 74: 177-98
- 345 9. Chen GY, Nunez G. 2009. Gut Immunity: a NOD to the commensals. *Curr Biol* 19: R171-  
346 4
- 347 10. Kawai T, Akira S. 2009. The roles of TLRs, RLRs and NLRs in pathogen recognition. *Int*  
348 *Immunol* 21: 317-37
- 349 11. Schneider C, O'Leary CE, von Moltke J, Liang HE, Ang QY, Turnbaugh PJ,  
350 Radhakrishnan S, Pellizzon M, Ma A, Locksley RM. 2018. A Metabolite-Triggered Tuft  
351 Cell-ILC2 Circuit Drives Small Intestinal Remodeling. *Cell* 174: 271-84 e14
- 352 12. Nadsombati MS, McGinty JW, Lyons-Cohen MR, Jaffe JB, DiPeso L, Schneider C, Miller  
353 CN, Pollack JL, Nagana Gowda GA, Fontana MF, Erle DJ, Anderson MS, Locksley RM,  
354 Raftery D, von Moltke J. 2018. Detection of Succinate by Intestinal Tuft Cells Triggers a  
355 Type 2 Innate Immune Circuit. *Immunity* 49: 33-41 e7
- 356 13. Fletcher SM, Stark D, Harkness J, Ellis J. 2012. Enteric protozoa in the developed world:  
357 a public health perspective. *Clin Microbiol Rev* 25: 420-49
- 358 14. Lukes J, Stensvold CR, Jirku-Pomajbikova K, Wegener Parfrey L. 2015. Are Human  
359 Intestinal Eukaryotes Beneficial or Commensals? *PLoS Pathog* 11: e1005039
- 360 15. 1998. *Dientamoeba fragilis*: A harmless commensal or a mild pathogen? *Paediatr Child*  
361 *Health* 3: 81-2
- 362 16. Escalante NK, Lemire P, Cruz Tleugabulova M, Prescott D, Mortha A, Streutker CJ,  
363 Girardin SE, Philpott DJ, Mallevaly T. 2016. The common mouse protozoa

- 364 Tritrichomonas muris alters mucosal T cell homeostasis and colitis susceptibility. *J Exp*  
365 *Med* 213: 2841-50
- 366 17. Chudnovskiy A, Mortha A, Kana V, Kennard A, Ramirez JD, Rahman A, Remark R,  
367 Mogno I, Ng R, Gnjatic S, Amir ED, Solovyov A, Greenbaum B, Clemente J, Faith J,  
368 Belkaid Y, Grigg ME, Merad M. 2016. Host-Protozoan Interactions Protect from Mucosal  
369 Infections through Activation of the Inflammasome. *Cell* 167: 444-56 e14
- 370 18. Howitt MR, Lavoie S, Michaud M, Blum AM, Tran SV, Weinstock JV, Gallini CA,  
371 Redding K, Margolskee RF, Osborne LC, Artis D, Garrett WS. 2016. Tuft cells, taste-  
372 chemosensory cells, orchestrate parasite type 2 immunity in the gut. *Science* 351: 1329-33
- 373 19. Chiaranunt P, Burrows K, Ngai L, Mortha A. 2020. Isolation of mononuclear phagocytes  
374 from the mouse gut. *Methods Enzymol* 632: 67-90
- 375 20. Barthel M, Hapfelmeier S, Quintanilla-Martinez L, Kremer M, Rohde M, Hogardt M,  
376 Pfeffer K, Russmann H, Hardt WD. 2003. Pretreatment of mice with streptomycin provides  
377 a Salmonella enterica serovar Typhimurium colitis model that allows analysis of both  
378 pathogen and host. *Infect Immun* 71: 2839-58
- 379 21. Idzko M, Ferrari D, Eltzschig HK. 2014. Nucleotide signalling during inflammation.  
380 *Nature* 509: 310-7
- 381 22. Atarashi K, Nishimura J, Shima T, Umesaki Y, Yamamoto M, Onoue M, Yagita H, Ishii  
382 N, Evans R, Honda K, Takeda K. 2008. ATP drives lamina propria T(H)17 cell  
383 differentiation. *Nature* 455: 808-12
- 384 23. Kouzaki H, Iijima K, Kobayashi T, O'Grady SM, Kita H. 2011. The danger signal,  
385 extracellular ATP, is a sensor for an airborne allergen and triggers IL-33 release and innate  
386 Th2-type responses. *J Immunol* 186: 4375-87

- 387 24. Baumann C, Bonilla WV, Frohlich A, Helmstetter C, Peine M, Hegazy AN, Pinschewer  
388 DD, Lohning M. 2015. T-bet- and STAT4-dependent IL-33 receptor expression directly  
389 promotes antiviral Th1 cell responses. *Proc Natl Acad Sci U S A* 112: 4056-61
- 390 25. Alvarez F, Fritz JH, Piccirillo CA. 2019. Pleiotropic Effects of IL-33 on CD4(+) T Cell  
391 Differentiation and Effector Functions. *Front Immunol* 10: 522
- 392 26. Krasna E, Kolesar L, Slavcev A, Valhova S, Kronosova B, Jaresova M, Striz I. 2005. IL-  
393 18 receptor expression on epithelial cells is upregulated by TNF alpha. *Inflammation* 29:  
394 33-7
- 395 27. Nakamura S, Otani T, Okura R, Ijiri Y, Motoda R, Kurimoto M, Orita K. 2000. Expression  
396 and responsiveness of human interleukin-18 receptor (IL-18R) on hematopoietic cell lines.  
397 *Leukemia* 14: 1052-9
- 398 28. Gorfu G, Cirelli KM, Melo MB, Mayer-Barber K, Crown D, Koller BH, Masters S, Sher  
399 A, Leppla SH, Moayeri M, Saeij JP, Grigg ME. 2014. Dual role for inflammasome sensors  
400 NLRP1 and NLRP3 in murine resistance to *Toxoplasma gondii*. *mBio* 5
- 401 29. Hunter CA, Subauste CS, Van Cleave VH, Remington JS. 1994. Production of gamma  
402 interferon by natural killer cells from *Toxoplasma gondii*-infected SCID mice: regulation  
403 by interleukin-10, interleukin-12, and tumor necrosis factor alpha. *Infect Immun* 62: 2818-  
404 24
- 405 30. Ewald SE, Chavarria-Smith J, Boothroyd JC. 2014. NLRP1 is an inflammasome sensor for  
406 *Toxoplasma gondii*. *Infect Immun* 82: 460-8
- 407 31. Liao KC, Mogridge J. 2013. Activation of the Nlrp1b inflammasome by reduction of  
408 cytosolic ATP. *Infect Immun* 81: 570-9

- 409 32. Mariathasan S, Weiss DS, Newton K, McBride J, O'Rourke K, Roose-Girma M, Lee WP,  
410 Weinrauch Y, Monack DM, Dixit VM. 2006. Cryopyrin activates the inflammasome in  
411 response to toxins and ATP. *Nature* 440: 228-32
- 412 33. Dybing JK, Walters N, Pascual DW. 1999. Role of endogenous interleukin-18 in resolving  
413 wild-type and attenuated *Salmonella typhimurium* infections. *Infect Immun* 67: 6242-8
- 414 34. Raupach B, Peuschel SK, Monack DM, Zychlinsky A. 2006. Caspase-1-mediated  
415 activation of interleukin-1beta (IL-1beta) and IL-18 contributes to innate immune defenses  
416 against *Salmonella enterica* serovar Typhimurium infection. *Infect Immun* 74: 4922-6
- 417 35. Mempin R, Tran H, Chen C, Gong H, Kim Ho K, Lu S. 2013. Release of extracellular ATP  
418 by bacteria during growth. *BMC Microbiol* 13: 301
- 419 36. Stark D, Barratt J, Chan D, Ellis JT. 2016. *Dientamoeba fragilis*, the Neglected  
420 Trichomonad of the Human Bowel. *Clin Microbiol Rev* 29: 553-80
- 421 37. Majowicz SE, Musto J, Scallan E, Angulo FJ, Kirk M, O'Brien SJ, Jones TF, Fazil A,  
422 Hoekstra RM, International Collaboration on Enteric Disease 'Burden of Illness S. 2010.  
423 The global burden of nontyphoidal *Salmonella* gastroenteritis. *Clin Infect Dis* 50: 882-9
- 424 38. Jertborn M, Haglind P, Iwarson S, Svennerholm AM. 1990. Estimation of symptomatic  
425 and asymptomatic *Salmonella* infections. *Scand J Infect Dis* 22: 451-5
- 426 39. Xu H, Zhang W, Zhang K, Zhang Y, Wang Z, Zhang W, Li Y, Li Q. 2021. Characterization  
427 of *Salmonella* serotypes prevalent in asymptomatic people and patients. *BMC Infect Dis*  
428 21: 632
- 429 40. Robertson SJ, Lemire P, Maughan H, Goethel A, Turpin W, Bedrani L, Guttman DS,  
430 Croitoru K, Girardin SE, Philpott DJ. 2019. Comparison of Co-housing and Littermate  
431 Methods for Microbiota Standardization in Mouse Models. *Cell Rep* 27: 1910-9 e2



433 **Footnotes**

434 Grant support

435 P.C. is supported by an Ontario Trillium Scholarship and a Vanier/NSERC Canada Graduate  
436 Scholarship. K.B. is supported by a Banting Postdoctoral Fellowship. L.N. is supported by an  
437 Ontario Graduate Scholarship. A.M. is supported by a CIHR-Project Grant (388337) and a  
438 NSERC-Discovery Grant (RGPIN-2019-04521). A.M. is the Tier 2 Canadian Research Chair in  
439 Mucosal Immunology and supported by the Tier 2 CRC-CIHR program.

440 Abbreviations used in this article:

441 *T. mu*, *Tritrichomonas musculus*; ATP, adenosine 3'-triphosphate; WT, wild-type; TLR, Toll-like  
442 receptor; NLR, Nod-like receptor

443



444 **Figure legends:**

445 **Figure 1.** Colonization with *T. mu* increases luminal extracellular ATP levels and IL-1 $\beta$  release in  
446 the colon.

447 (A-C) C57BL/6 mice were either left untreated or orally gavaged with  $2 \times 10^6$  purified *T. mu*.  
448 Analysis was performed 3 weeks post-gavage. (A) Levels of extracellular ATP were measured in  
449 the fecal supernatants of freshly isolated fecal pellets using the Promega ENLITEN ATP Assay as  
450 per the manufacturer's instructions. (B and C) Colonic explants were placed in RPMI + gentamicin  
451 for 30 min, then incubated overnight at 37°C in 500  $\mu$ L RPMI supplemented with gentamicin,  
452 penicillin/streptomycin, and 5% FBS. Supernatants were collected for IL-1 $\beta$ , IL-18, or IL-33  
453 ELISA analysis. Data shown is representative of at least three independent experiments with at  
454 least three mice per group per experiment. Data show mean  $\pm$  SEM. Unpaired student's t test was  
455 performed; \* $p < 0.05$ , \*\*\*\* $p < 0.0001$ ; n.s., not significant.

456

457 **Figure 2.** The protozoan commensal *T. mu* induces accumulation of IL-18R<sup>+</sup> Th1 and Th17 cells  
458 in the lamina propria.

459 C57BL/6 mice were either left untreated or orally gavaged with  $2 \times 10^6$  purified *T. mu*. Colons  
460 were harvested 3 weeks later. Colonic lamina propria leukocytes were isolated, stimulated for 4 h  
461 with PMA and ionomycin in the presence of protein transport inhibitor cocktail, and then stained  
462 and analyzed via flow cytometry for (A) IFN- $\gamma$  and IL-17A production by CD4<sup>+</sup> T cells, IL-18R  
463 expression in (B) IFN $\gamma$ -producing CD4<sup>+</sup> T cells and (C) IL-17A-producing CD4<sup>+</sup> T cells, or (D)  
464 ST2 expression in IFN $\gamma$ -producing CD4<sup>+</sup> T cells. Bar graphs show absolute numbers of cell  
465 populations represented in respective flow cytometry plots. Data shown is representative of at least

466 three independent experiments with at least three mice per group per experiment. Data show mean  
467  $\pm$  SEM. Student's t test was performed; \* $p < 0.05$ , \*\* $p < 0.01$ , \*\*\* $p < 0.001$ ; n.s., not significant.

468 **Figure 3.** NLRP1B and NLRP3 are required for a full Th1 and Th17 host response after *T. mu*  
469 colonization.

470 C57BL/6, *Nlrp1b*<sup>-/-</sup>, or *Nlrp3*<sup>-/-</sup> mice were either left untreated or orally gavaged with  $2 \times 10^6$   
471 purified *T. mu*. Colons were harvested 3 weeks later. (A-C) Colonic lamina propria leukocytes  
472 were isolated, stimulated for 4 h with PMA and ionomycin in the presence of protein transport  
473 inhibitor cocktail, and then stained and analyzed via flow cytometry for (A and B) IFN $\gamma$  and IL-  
474 17A production by CD4<sup>+</sup> T cells, and (C) IL-18R expression in IFN $\gamma$ -producing or IL-17A-  
475 producing CD4<sup>+</sup> T cells. (B) Bar graphs show absolute numbers of cell populations represented in  
476 respective flow cytometry plots from (A). (D) Colonic lamina propria leukocytes were isolated  
477 and analyzed via flow cytometry for Ly6C<sup>hi</sup> CD64<sup>+</sup> CD11b<sup>+</sup> immature macrophages. Data shown  
478 is representative of at least three independent experiments with at least three mice per group per  
479 experiment. Data show mean  $\pm$  SEM. Two-way ANOVA with post-hoc Sidak correction was  
480 performed; \* $p < 0.05$ , \*\* $p < 0.01$ , \*\*\* $p < 0.001$ , \*\*\*\* $p < 0.0001$ ; n.s., not significant.

481 **Figure 4.** *T. mu* mediates host protection against *Salmonella typhimurium* in an NLRP1B- and  
482 NLRP3-dependent fashion.

483 C57BL/6, *Nlrp1b*<sup>-/-</sup>, or *Nlrp3*<sup>-/-</sup> mice were either left untreated or orally gavaged with  $2 \times 10^6$   
484 purified *T. mu* 3 weeks prior to *Salmonella typhimurium* infection. (A) Colony-forming units  
485 (CFUs) of *S. typhimurium* were measured in fecal pellets 48 h after infection. (B) Cecum weights  
486 were measured. (C and D) Blinded pathological scoring was performed on H&E-stained cecal  
487 tissue sections. (E) Colony-forming units (CFUs) of *S. typhimurium* were measured in the spleen

488 and liver 48 h after infection. Data shown is representative of at least 3 independent experiments.  
489 Data show mean  $\pm$  SEM. Two-way ANOVA with Sidak correction was performed; \* $p < 0.05$ , \*\* $p$   
490  $< 0.01$ , \*\*\* $p < 0.001$ , \*\*\*\* $p < 0.0001$ ; n.s., not significant.

491

492 **Supplementary Figure 1.** Viable *T. mu* drives Th cell activation but does not alter TNF $\alpha$   
493 production in Th cells.

494 (A)  $2 \times 10^6$  purified *T. mu* was either immediately orally gavaged or incubated at 95°C for 1 min  
495 prior to gavage into C57BL/6 mice. 3 weeks later, colonic lamina propria leukocytes were isolated,  
496 stimulated for 4 h with PMA and ionomycin in the presence of protein transport inhibitor cocktail,  
497 and then stained and analyzed via flow cytometry for IFN- $\gamma$  and IL-17A production by CD4 $^+$  T  
498 cells. (B) C57BL/6 mice were either left untreated or orally gavaged with  $2 \times 10^6$  purified *T. mu*.  
499 3 weeks later, colonic lamina propria leukocytes were isolated, stimulated for 4 h with PMA and  
500 ionomycin in the presence of protein transport inhibitor cocktail, and then stained and analyzed  
501 via flow cytometry for TNF $\alpha$  production by CD4 $^+$  T cells. (C) C57BL/6 or *P2x7r $^{-/-}$*  mice were  
502 either left untreated or orally gavaged with  $2 \times 10^6$  purified *T. mu*. 3 weeks later, colonic lamina  
503 propria leukocytes were isolated and analyzed via flow cytometry for Ly6C $^{\text{hi}}$  CD64 $^+$  CD11b $^+$   
504 immature macrophages. Data shown is representative of at least three independent experiments.  
505 Data show mean  $\pm$  SEM. Student's t test was performed for (B), two-way ANOVA with post-hoc  
506 Sidak correction was performed for (C); \* $p < 0.05$ , \*\* $p < 0.01$ , \*\*\* $p < 0.001$ ; n.s., not significant.

507

508 **Supplementary Figure 2.** NLRP1B- and NLRP3-dependent release of IL-1 $\beta$  following  
509 colonization with *T. mu*.

510 C57BL/6, *Nlrp1b*<sup>-/-</sup>, and *Nlrp3*<sup>-/-</sup> mice were either left untreated or orally gavaged with 2 x 10<sup>6</sup>  
511 purified *T. mu*. 3 weeks later, colonic explants were placed in RPMI + gentamicin for 30 min, then  
512 incubated overnight at 37C in 500 uL RPMI supplemented with gentamicin,  
513 penicillin/streptomycin, and 5% FBS. Supernatants were collected for IL-1β and IL-18 ELISA  
514 analysis. Data show mean ± SEM. Two-way ANOVA with post-hoc Sidak correction was  
515 performed; \*p < 0.05, \*\*p < 0.01, \*\*\*p < 0.001; n.s., not significant.

516

**Figure 1.** Colonization with *T.mu* increases luminal, extracellular ATP levels and IL-1 $\beta$  release in the colon.

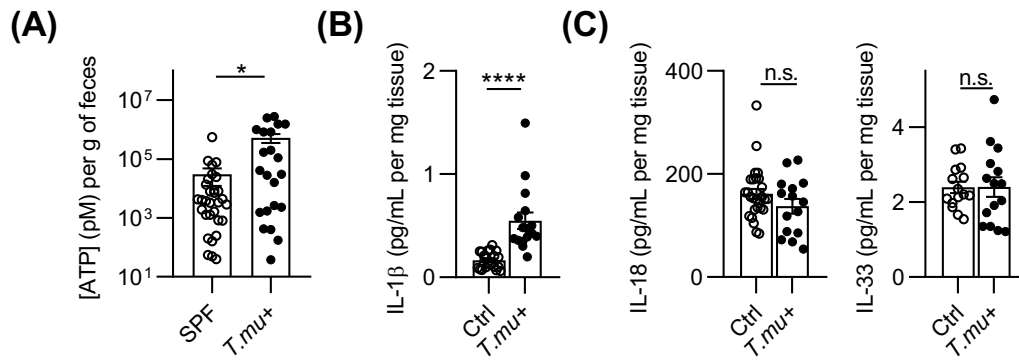

**Figure 2.** The protozoan commensal *T. mu* induces accumulation of IL-18R<sup>+</sup> Th1 and Th17 cells in the lamina propria.

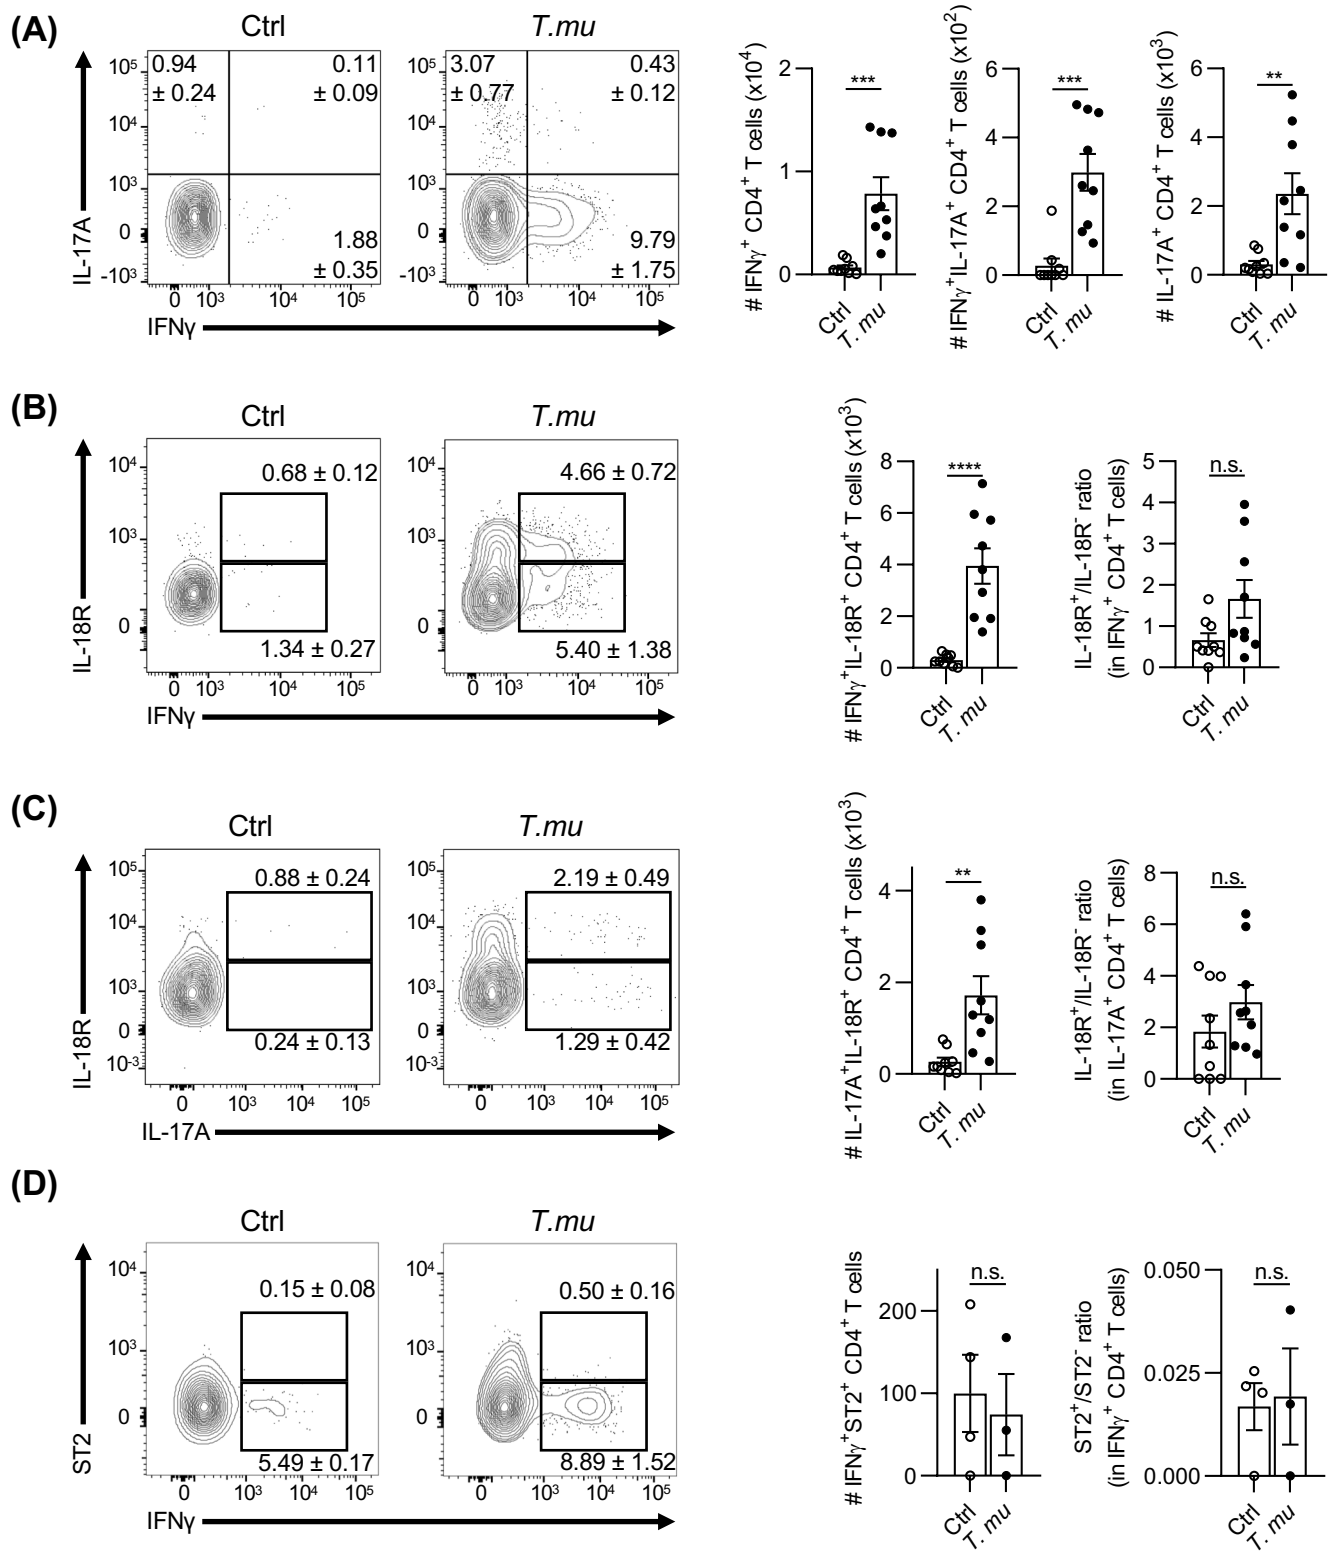

**Figure 3. NLRP1B and NLRP3 are required for a full Th1 and Th17 host response after *T. mu* colonization.**

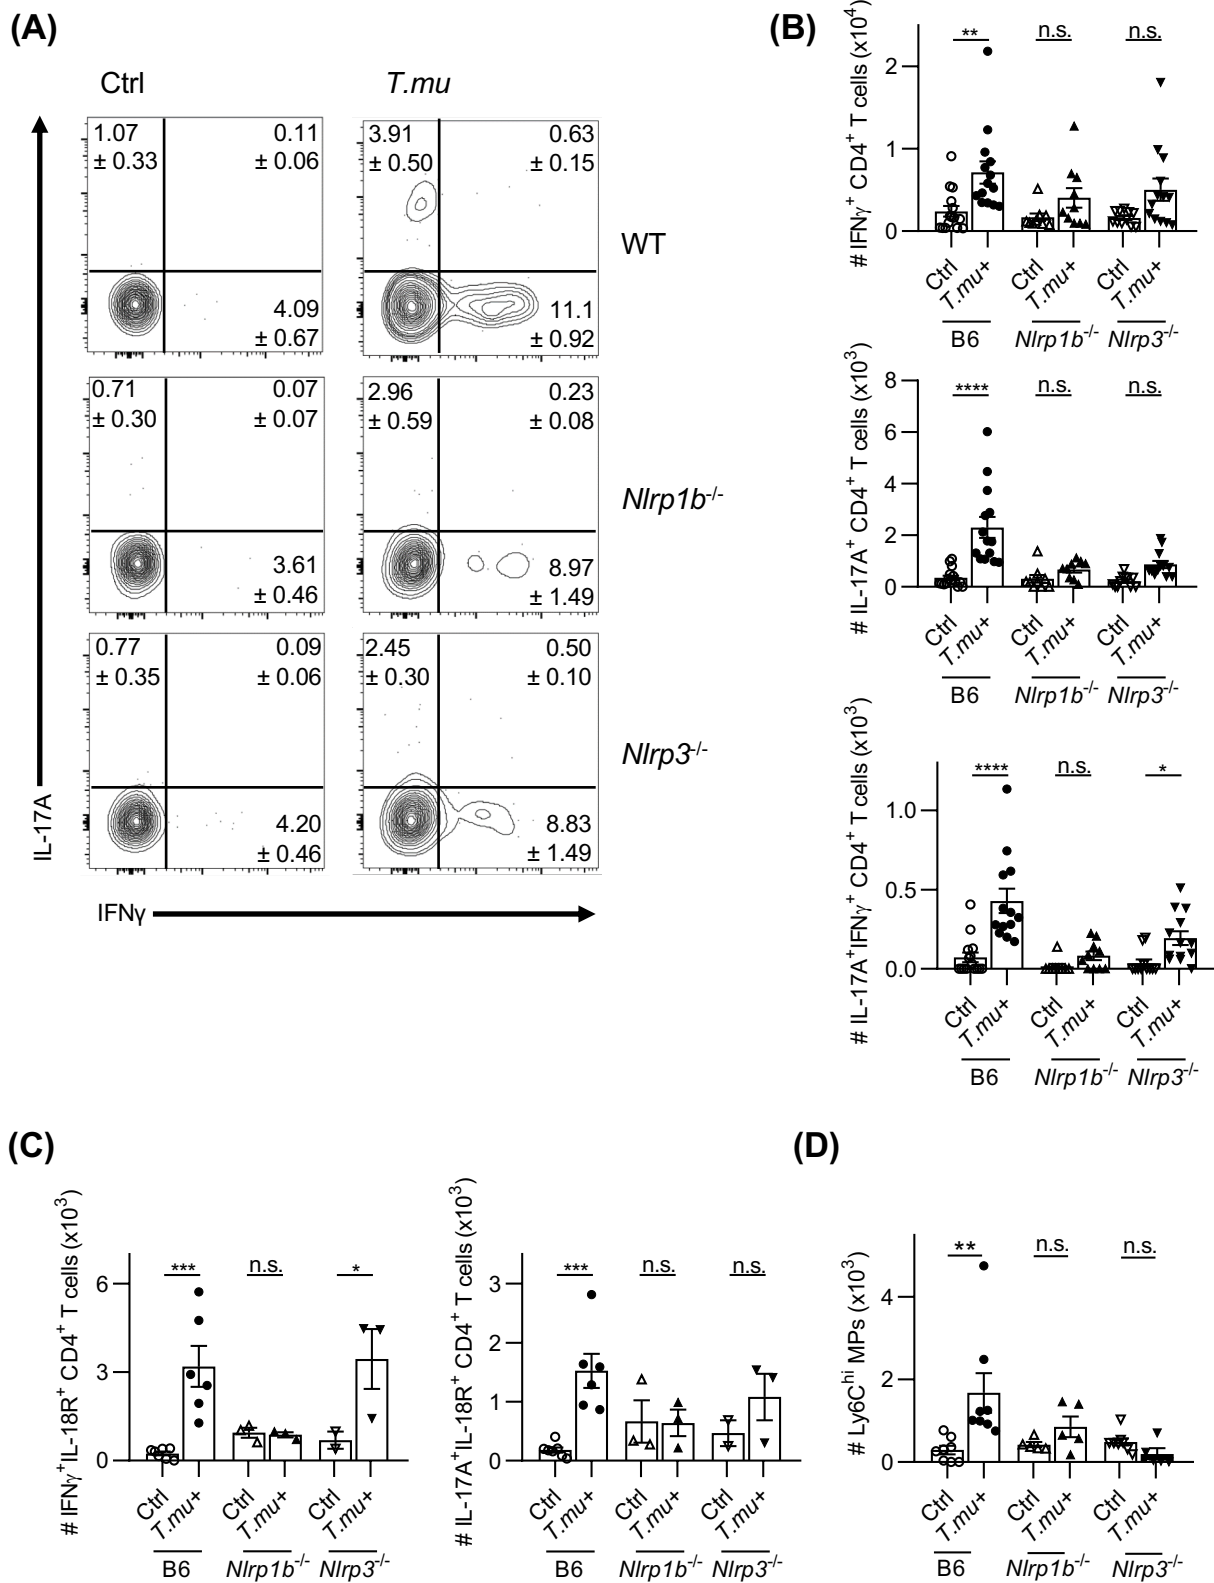

**Figure 4.** *T. mu* mediates host protection against *Salmonella typhimurium* in an NLRP1B- and NLRP3-dependent fashion.

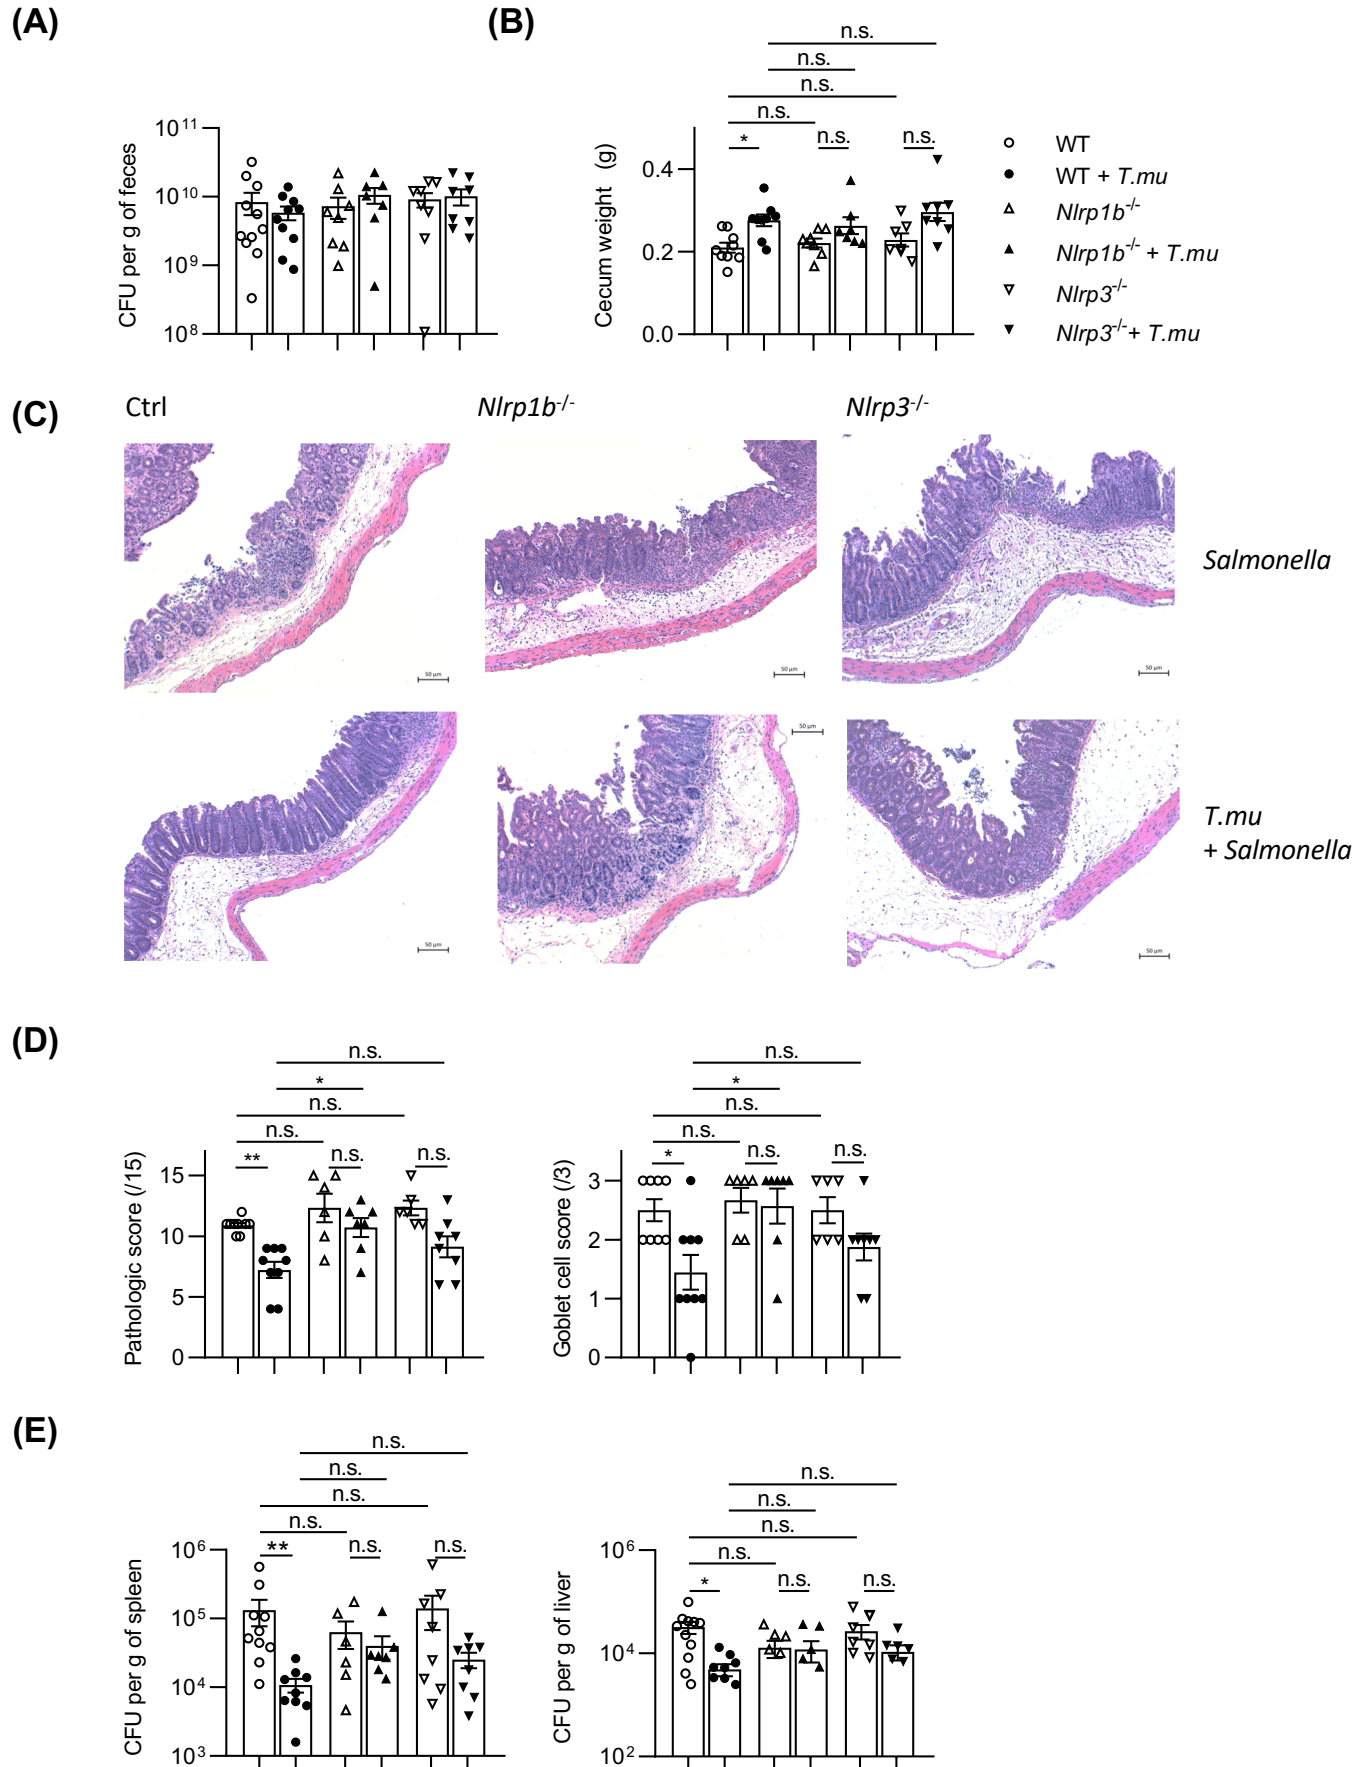



## Supplementary Figure 1. Viable *T. mu* drives Th cell activation but does not alter TNF $\alpha$ production in Th cells.

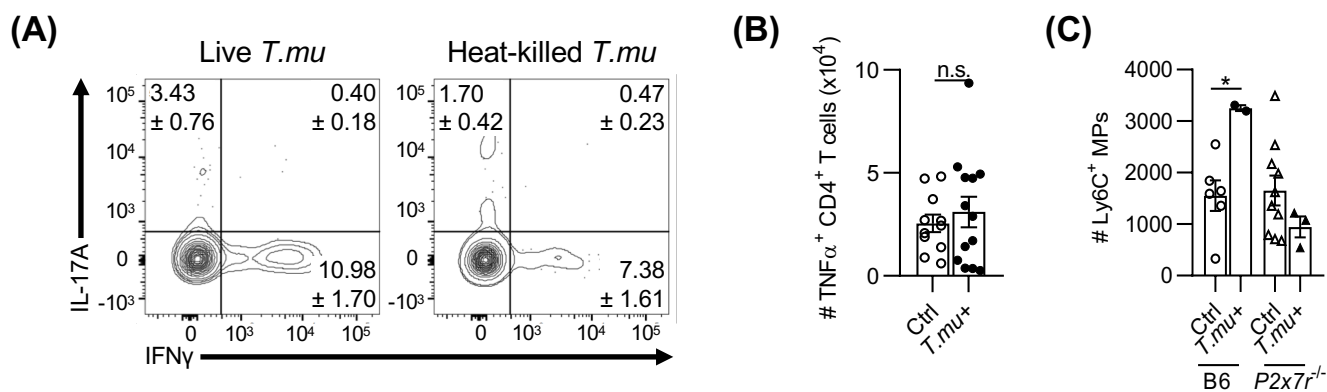

## Supplementary Figure 2. NLRP1B and NLRP3-dependent release of IL-1 $\beta$ following colonization with *T. mu.*

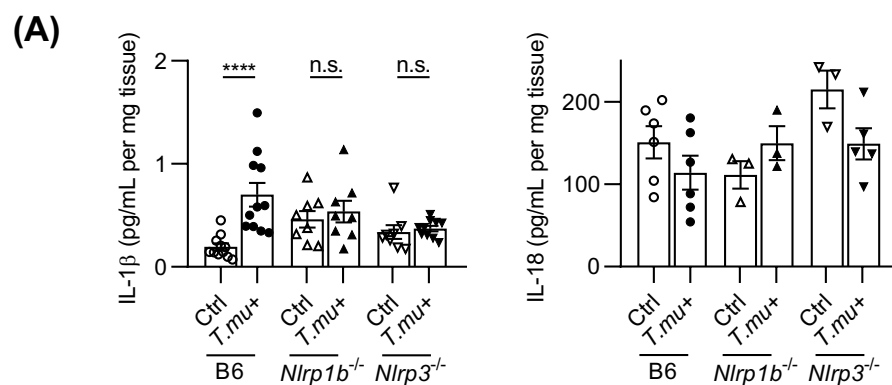

Source: https://biorxiv.org/content/10.1101/2021.08.14.455483v1.full.pdf
